# Supplementary material for: LncRNA MALAT1 promotes gastric cancer progression via inhibiting autophagic flux and inducing fibroblast activation
Source: PubMed Central journal article supplement (PMC8024309; doi:10.1038/s41419-021-03645-4), 2021-04-06
Supplement: 41419_2021_3645_MOESM6_ESM.pdf [file 41419_2021_3645_MOESM6_ESM.pdf]

RiboTM h-MALAT1 Smart Silencer (MALAT1 siRNA)  
SQSTM1 siRNA

G TTCAGAAGGTCTGAAGCTCdTdT  
GUAAGCCUAGGUGUUGUCATT

Primers

MALAT1 Forward

MALAT1 Reverse

GAPDH Forward

GAPDH Reverse

IL-6 Forward

IL-6 Reverse

PTEN Forward

PTEN Reverse

SQSTM1 Forward

SQSTM1 Reverse

MALAT1 promoter Forward

MALAT1 promoter Reverse

PTEN 3'UTR#1 Forward

PTEN 3'UTR#1 Reverse

PTEN 3'UTR#2 Forward

PTEN 3'UTR#2 Reverse

ATGCGAGTTGTTCTCCGTCT

TATCTGCGGTTTCCTCAAGC

CAATGACCCCTTCATTGACC

GACAAGCTTCCCGTTCTCAG

CGGTCCAGTTGCCTTCTCCC

GAGTGGCTGTCTGTGTGGGG

GGTGGGTTATGGTCTTCAAAGG

TTTGAAGACCATAACCCACCAC

GACTACGACTTGTGTAGCGTC

AGTGTCCGTGTTTCACCTTCC

GCGTGGTAAGAGGCTCTCAAC

GACGTCAAGGCACTTTAAATGC

AGAGTGACTACTGTGGAGTGGT

GGGAAGACAGAAAAAGAAAATGCC

AGTCTCTTGGTATGCATGGGGG

AGACTCAAGCCAAAGAAGAACAGAAAA

**Relative expression levels of cytokines**

| Row     | Column | Name         | MKN-45/MALAT1 | MGC-803/MALAT1 |
|---------|--------|--------------|---------------|----------------|
|         |        |              | vs MKN-45/NC  | vs MGC-803/NC  |
| 1,2,7,8 | 1,2,12 | Pos(Average) | 1             | 1              |
| 1,2     | 3,11   | Neg          | N/A           | N/A            |
| 1,2     | 4      | Neg          | N/A           | N/A            |
| 1,2     | 5      | ENA-78       | 0.658490904   | 0.957587915    |
| 1,3     | 6      | GCSF         | 0.151430231   | 0.974159137    |
| 1,4     | 7      | GM-CSF       | 0.801138341   | 0.902738656    |
| 1,5     | 8      | GRO a/b/g    | 0.976844179   | 0.9291891      |
| 1,6     | 9      | GRO alpha    | 0.670418339   | 0.773311732    |
| 1,7     | 10     | I-309        | 0.884879206   | 0.804223305    |
| 1,8     | 11     | IL-1 alpha   | 0.990624647   | 1.061337388    |
| 1,9     | 12     | IL-1 beta    | 0.80576893    | 1.706579569    |
| 3,4     | 1      | IL-2         | 1.513528157   | 2.32369976     |
| 3,4     | 2      | IL-3         | 1.083811904   | 1.005388013    |
| 3,4     | 3      | IL-4         | 0.712833398   | 1.611402285    |
| 3,4     | 4      | IL-5         | 1.133431759   | 1.49241915     |
| 3,4     | 5      | IL-6         | 1.544433157   | 2.328245917    |
| 3,4     | 6      | IL-7         | 0.51153105    | 2.24593409     |
| 3,4     | 7      | IL-8         | 1.104263357   | 1.077188638    |
| 3,4     | 8      | IL-10        | 0.958084828   | 0.971422309    |
| 3,4     | 9      | IL-12 p40/p  | 1.005425917   | 0.64112196     |
| 3,4     | 10     | IL-13        | 0.956465383   | 1.062744586    |
| 3,4     | 11     | IL-15        | 1.54573651    | 0.546276747    |
| 3,4     | 12     | IFN-gamma    | 0.930760757   | 0.649016859    |
| 5,6     | 1      | MCP-1        | 1.168771748   | 1.104746998    |
| 5,6     | 2      | MCP-2        | 1.381379767   | 1.288935334    |
| 5,6     | 3      | MCP-3        | 1.58997778    | 1.3395838      |
| 5,6     | 4      | M-CSF        | 1.124471925   | 0.907768318    |
| 5,6     | 5      | MDC          | 1.031726566   | 0.911966393    |
| 5,6     | 6      | MIG          | 0.821743057   | 1.623995885    |
| 5,6     | 7      | MIP-1 delta  | 0.564604753   | 0.95604339     |
| 5,6     | 8      | RANTES       | 0.972901827   | 0.958860792    |
| 5,6     | 9      | SCF          | 1.368968913   | 0.426942374    |
| 5,6     | 10     | SDF-1        | 0.768338127   | 0.831544413    |
| 5,6     | 11     | TARC         | 1.21497394    | 0.709801682    |
| 5,6     | 12     | TGF          | 0.975556647   | 1.040148306    |
| 7,8     | 1      | TNF alpha    | 1.121881796   | 1.105808464    |
| 7,8     | 2      | TNF beta     | 0.985943811   | 0.903030068    |
| 7,8     | 3      | EGF          | 1.162921569   | 0.494631833    |
| 7,8     | 4      | IGF-1        | 4.524516376   | 0.493218505    |
| 7,8     | 5      | Angiogenin   | 2.553761185   | 0.565326722    |
| 7,8     | 6      | OSM          | 0.744109865   | 0.933857189    |
| 7,8     | 7      | TPO          | 1.253721203   | 2.090425766    |
| 7,8     | 8      | VEGF-A       | 0.578197443   | 0.573527696    |
| 7,8     | 9      | PDGF-BB      | 0.831623964   | 0.89394973     |
| 7,8     | 10     | Leptin       | 0.850946662   | 1.285957545    |
